Articles of interest in other COB journals

From *Journal of Cell Science*

**In vivo role of lipid adducts on Wingless**

Franch-Marro, X. et al. 2008. *J. Cell Sci.* doi: 10.1242/jcs.015958

**Interaction between the *Drosophila* heterochromatin proteins SUUR and HP1**

Pindyurin, A. V. et al. 2008. *J. Cell Sci.* doi: 10.1242/jcs.018655
